# Supplementary material for: Effect of stoichiometry on the surface energies of {100} and {111} and the crystal shape of TiCx and TiNx
Source: Royal Society of Chemistry journal article supplement (doi:10.1039/c2ce26419f), 2012-11-07
Supplement: c2ce26419f.pdf [file c2ce26419f.pdf]

## Computation details

In the current work, all density-functional theory (DFT) calculations were performed in the DMOL3 code.<sup>23</sup> The Perdew Wang<sup>24</sup> (PW91) version of generalized gradient approximation (GGA) was employed as exchange correlation function. The tolerances of geometry optimization were set as the difference of the total energy within  $10^{-5}$  hartree, maximum force within 0.002 hartree/Å and maximum displacement in 0.005 Å. The Gaussian smearing of electron density was applied with the energy range of 0.005 hartree.

TiC<sub>1.0</sub> and TiN<sub>1.0</sub> are face centered cubic (fcc) structures belong to Fm-3m space group. First, the crystal which contains 4 metal Ti atoms and 4 non-metal C/N atoms was made. The metal atom sit at (0, 0, 0) and the non-metal atom sit at (0.5, 0.5, 0.5). The lattice constants for TiC<sub>1.0</sub> and TiN<sub>1.0</sub> are 4.33 and 4.25, respectively. Second, a 2×2×2 supercell was constructed consists of 32 Ti atoms and 32 C/N atoms (see Figure A). The models for different stoichiometry of TiC<sub>x</sub> and TiN<sub>x</sub> we adopt from Hugosson's work<sup>22</sup> are shown in Figure 1. The corresponding values of *x* of the substoichiometric TiC<sub>x</sub> and TiN<sub>x</sub> were 0.50, 0.625, 0.75, 0.875 and 1.0. The formation energies (*E*<sub>form</sub>) of TiC<sub>x</sub> and TiN<sub>x</sub> with different stoichiometries were shown in Table A.

Figure B shows the crystal structures the {100} and {111} surfaces. It can be seen that the {100} planes contain both Ti and C(N) atoms in each slab, but the polar {111} planes contain alternating arrangement of Ti and C(N) layers and is Ti terminated at both the ends. The minimum slab thickness for TiC<sub>x</sub> and TiN<sub>x</sub> is 7 atom

layers for {100} surfaces, and 9 for {111} surfaces. The surfaces calculated in the work are fully relaxed for all layers. To model the {100} and {111} surfaces, we used the supercell approach with a vacuum of 15 Å between the slabs.

The surface energy of {100} and {111},  $\sigma$ , can be given by

$$\sigma = (E_{tot} - N_{Ti}\mu_{Ti} - N_{C/N}\mu_{C/N})/2A \quad (1)$$

Here,  $E_{tot}$  is the total energy of the slab, and  $\mu_{Ti}$  and  $\mu_{C/N}$  are the chemical potentials of each Ti and C(N) atom, respectively. In addition,  $N_{Ti}$  and  $N_{C/N}$  are the numbers of the corresponding atoms in the slabs. The total chemical potential of the elemental Ti and C(N) is in equilibrium with that of bulk  $TiC_{1.0}$  and  $TiN_{1.0}$ :

$\mu_{TiC(N)_{1.0}}(\text{bulk}) = \mu_{Ti} + \mu_{C/N}$ . Accordingly, Eq. (1) becomes

$$\sigma = (E_{tot} - N_{Ti}\mu_{TiC(N)_{1.0}}(\text{bulk}) + (N_{Ti} - N_{C/N})\mu_{C/N})/2A \quad (2)$$

The elemental C(N) chemical potential was used to replace the corresponding bulk chemical potential which is  $-1.66 \times 10^{-16}$  J/atom and  $-2.38 \times 10^{-16}$  J/atom, respectively.

The Brillouin-zone integrations were set within  $6 \times 6 \times 6$  k-point mesh for the bulk and  $6 \times 6 \times 1$  k-point mesh for the slab. None spin polarization was used for both bulk and surface calculations.

## FIGURE CAPTIONS

Figure A. The crystal structures of single crystal and supercell of  $\text{TiC}_{1.0}$  ( $\text{TiN}_{1.0}$ ).

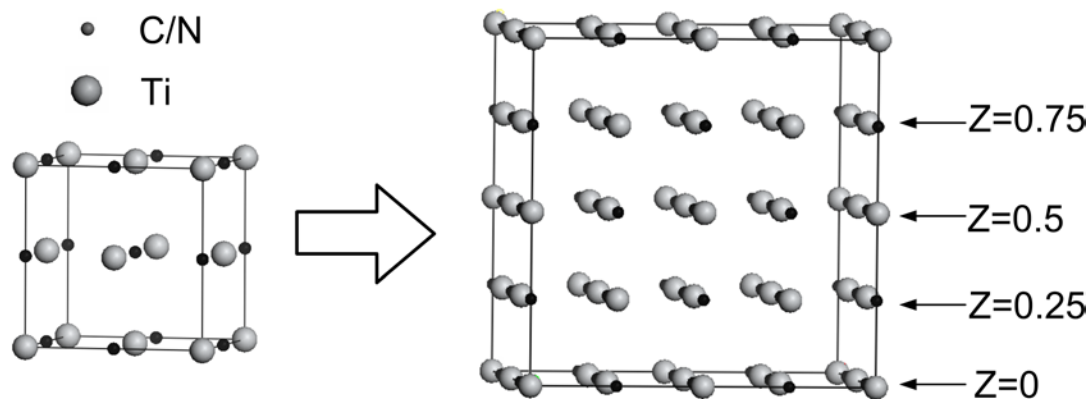

Figure B. Crystal structures of  $\{100\}$  and  $\{111\}$  surfaces with a vacuum of 15 Å between the slabs.

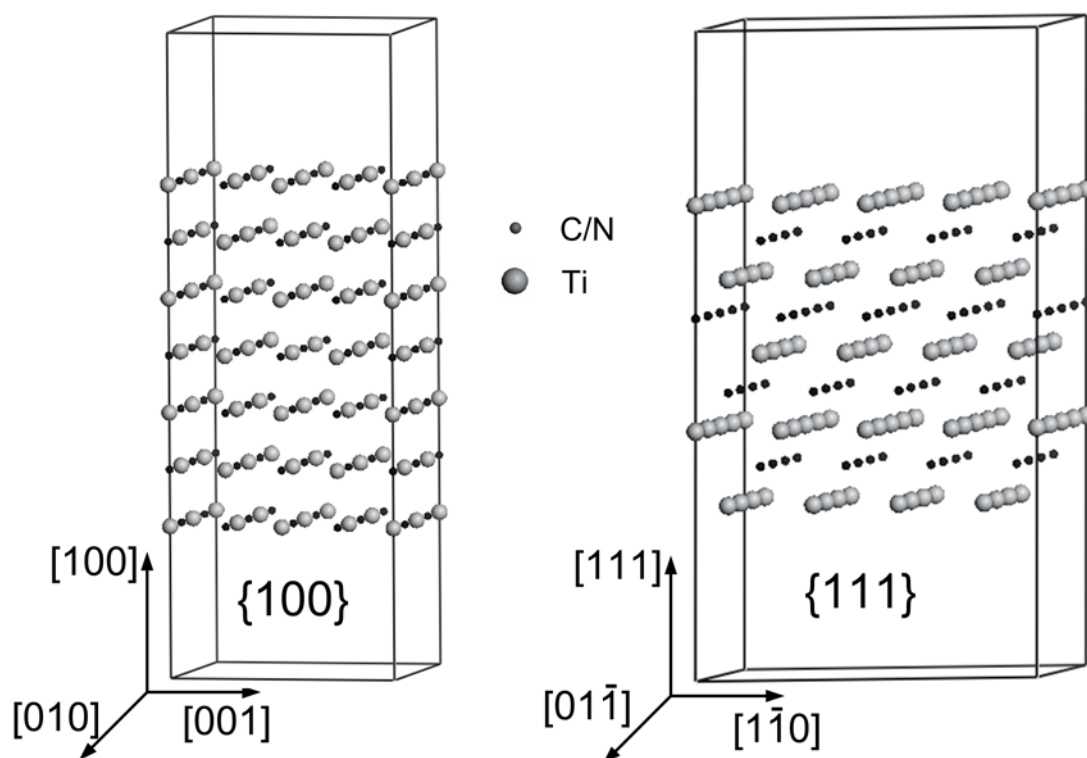

Table A. The formation energies ( $E_{\text{form}}$ ) of  $\text{TiC}_x$  and  $\text{TiN}_x$  with different stoichiometry  $x$ .

| $x$                              | 0.5                     | 0.625                   | 0.75                    | 0.875                   | 1.0                     |
|----------------------------------|-------------------------|-------------------------|-------------------------|-------------------------|-------------------------|
| $E_{\text{form}}(\text{J/atom})$ |                         |                         |                         |                         |                         |
| $\text{TiC}_x$                   | $-1.10 \times 10^{-19}$ | $-1.26 \times 10^{-19}$ | $-1.35 \times 10^{-19}$ | $-1.43 \times 10^{-19}$ | $-1.47 \times 10^{-19}$ |
| $\text{TiN}_x$                   | $-2.12 \times 10^{-19}$ | $-2.45 \times 10^{-19}$ | $-2.68 \times 10^{-19}$ | $-2.84 \times 10^{-19}$ | $-2.95 \times 10^{-19}$ |
